# Supplementary material for: Ab initio structure determination of BiPb2VO6 from powder diffraction data
Source: Royal Society of Chemistry journal article supplement (doi:10.1039/b105242j), 2001-01-01
Supplement: b105242j1.doc [file b105242j1.doc]

Ab initio structure determination of BiPb2VO6 from powder diffraction data

Ivana Radosavljevic Evans,a Judith A. K. Howard,a Ray L. Withersb and John S. O. Evansa

**Supplementary Information – Fractional Coordinates and Valence Sums**

| Site | x | y | z | Uiso | Valence |
| --- | --- | --- | --- | --- | --- |
| BI1 | 0.074(2) | 0.501(3) | 0.2010(6) | 1.18(5) | 2.455 |
| BI2 | 0.816(2) | -0.007(2) | 0.1582(6) | 1.18(5) | 2.762 |
| BI3 | 0.616(2) | 0.004(3) | 0.8975(6) | 1.18(5) | 2.269 |
| BI4 | 0.401(2) | 0.488(2) | 0.4470(4) | 1.18(5) | 2.147 |
| PB1 | 0.588(2) | 0.026(3) | 0.3747(7) | 1.18(5) | 2.424 |
| PB2 | 0.803(2) | 0.484(2) | 0.8201(7) | 1.18(5) | 2.300 |
| PB3 | 0.867(2) | 0.044(2) | 0.2781(6) | 1.18(5) | 2.399 |
| PB4 | 0.117(2) | 0.477(3) | 0.7295(6) | 1.18(5) | 2.293 |
| PB5 | 0.182(3) | -0.012(2) | 0.5190(7) | 1.18(5) | 2.710 |
| PB6 | 1.007(3) | 0.511(3) | 0.07584(7) | 1.18(5) | 2.251 |
| PB7 | 0.928(3) | 0.463(2) | 0.4737(7) | 1.18(5) | 1.991 |
| PB8 | 0.260(3) | -0.027(3) | 0.1284(7) | 1.18(5) | 2.130 |
| V1 | 0.351(2) | 1.056(2) | 0.2388(6) | 1.68(8) | 5.015 |
| V2 | 0.174(2) | 0.027(2) | 0.0035(6) | 1.68(8) | 5.017 |
| V3 | 0.028(3) | -0.490(2) | 0.6000(7) | 1.68(8) | 5.006 |
| V4 | 0.335(2) | 0.510(2) | 0.8573(7) | 1.68(8) | 5.006 |
| O11 | 0.40545 | 1.25862 | 0.19935 | 1.68(8) | 1.994 |
| O12 | 0.16801 | 1.14238 | 0.26421 | 1.68(8) | 1.909 |
| O13 | 0.31289 | 0.79945 | 0.21142 | 1.68(8) | 1.955 |
| O14 | 0.52053 | 1.02655 | 0.28042 | 1.68(8) | 1.694 |
| O21 | 0.10038 | -0.08889 | 0.0527 | 1.68(8) | 1.981 |
| O22 | 0.06031 | -0.08617 | -0.04402 | 1.68(8) | 1.932 |
| O23 | 0.14523 | 0.31922 | 0.00419 | 1.68(8) | 1.868 |
| O24 | 0.39184 | -0.03279 | 0.00145 | 1.68(8) | 2.109 |
| O31 | 0.09583 | -0.62214 | 0.6512 | 1.68(8) | 1.979 |
| O32 | -0.19428 | -0.46337 | 0.59636 | 1.68(8) | 1.915 |
| O33 | 0.12143 | -0.22372 | 0.59811 | 1.68(8) | 1.765 |
| O34 | 0.08951 | -0.65251 | 0.55468 | 1.68(8) | 1.889 |
| O41 | 0.32443 | 0.26055 | 0.88836 | 1.68(8) | 1.892 |
| O42 | 0.37136 | 0.73639 | 0.8947 | 1.68(8) | 2.156 |
| O43 | 0.50226 | 0.49261 | 0.82161 | 1.68(8) | 1.877 |
| O44 | 0.14235 | 0.55131 | 0.82483 | 1.68(8) | 1.809 |
| O1 | 0.385(3) | 0.190(4) | 0.721(1) | 1.38(9) | 2.344 |
| O2 | 0.327(4) | 0.732(5) | 0.718(1) | 1.38(9) | 2.395 |
| O3 | 0.344(4) | 0.276(4) | 0.376(1) | 1.38(9) | 2.099 |
| O4 | 0.176(4) | 0.217(5) | 0.457(1) | 1.38(9) | 2.314 |
| O5 | 0.023(4) | 0.728(5) | 0.137(1) | 1.38(9) | 2.437 |
| O6 | 0.370(4) | 0.765(5) | 0.384(1) | 1.38(9) | 1.851 |
| O7 | 0.047(3) | 0.233(4) | 0.142(1) | 1.38(9) | 1.981 |
| O8 | 0.160(3) | 0.704(4) | 0.468(1) | 1.38(9) | 2.033 |
