# Supplementary material for: Ab initio structure determination of BiPb2VO6 from powder diffraction data
Source: Royal Society of Chemistry journal article supplement (doi:10.1039/b105242j), 2001-01-01
Supplement: b105242j2.doc [file b105242j2.doc]

Ab initio structure determination of BiPb2VO6 from powder diffraction data

Ivana Radosavljevic Evans,a Judith A. K. Howard,a Ray L. Withersb and John S. O. Evansa

**Supplementary Information – Bond Distances and Angles**

Space group P n

Lattice constants are 7.72190 5.84430 29.07620 90 94.278 90

Bi1 0.07400 0.50100 0.20100

Bi2 0.81600 -0.00700 0.15820

Bi3 0.61600 0.00400 0.89750

Bi4 0.40100 0.48800 0.44700

Pb1 0.58800 0.02600 0.37470

Pb2 0.80300 0.48400 0.82010

Pb3 0.86700 0.04400 0.27810

Pb4 0.11700 0.47700 0.72950

Pb5 0.18200 -0.01200 0.51900

Pb6 1.00700 0.51100 0.07584

Pb7 0.92800 0.46300 0.47370

Pb8 0.26000 -0.02700 0.12840

V1 0.35100 1.05600 0.23880

V2 0.17400 0.02700 0.00350

V3 0.02800 -0.49000 0.60000

V4 0.33500 0.51000 0.85730

O11 0.40545 1.25862 0.19935

O12 0.16801 1.14238 0.26421

O13 0.31289 0.79945 0.21142

O14 0.52053 1.02655 0.28042

O21 0.10038 -0.08889 0.05270

O22 0.06031 -0.08617 -0.04402

O23 0.14523 0.31922 0.00419

O24 0.39184 -0.03279 0.00145

O31 0.09583 -0.62214 0.65120

O32 -0.19428 -0.46337 0.59636

O33 0.12143 -0.22372 0.59811

O34 0.08951 -0.65251 0.55468

O41 0.32443 0.26055 0.88836

O42 0.37136 0.73639 0.89470

O43 0.50226 0.49261 0.82161

O44 0.14235 0.55131 0.82483

O1 0.38500 0.19000 0.72100

O2 0.32700 0.73200 0.71800

O3 0.34400 0.27600 0.37600

O4 0.17600 0.21700 0.45700

O5 0.02300 0.72800 0.13700

O6 0.37000 0.76500 0.38400

O7 0.04700 0.23300 0.14200

O8 0.16000 0.70400 0.46800

Vector Length Optr Cell Neighbor atom coordinates

Bi1_O11 2.92880 1 0-1 0 0.40545 0.25862 0.19935

Bi1_O12 2.84580 1 0-1 0 0.16801 0.14238 0.26421

Bi1_O13 2.54040 1 0 0 0 0.31289 0.79945 0.21142

Bi1_O1 2.41991 2-1 1-1 -0.11500 0.81000 0.22100

Bi1_O2 2.42427 2-1 1-1 -0.17300 0.26800 0.21800

Bi1_O5 2.29535 1 0 0 0 0.02300 0.72800 0.13700

Bi1_O7 2.32083 1 0 0 0 0.04700 0.23300 0.14200

Angle Degrees atom 1 loc atom 3 loc

O11_Bi1_O12 58.213 1 0-1 0 1 0-1 0

O11_Bi1_O13 72.924 1 0-1 0 1 0 0 0

O11_Bi1_O1 155.273 1 0-1 0 2-1 1-1

O11_Bi1_O2 115.687 1 0-1 0 2-1 1-1

O11_Bi1_O5 111.319 1 0-1 0 1 0 0 0

O11_Bi1_O7 72.056 1 0-1 0 1 0 0 0

O12_Bi1_O13 106.300 1 0-1 0 1 0 0 0

O12_Bi1_O1 121.586 1 0-1 0 2-1 1-1

O12_Bi1_O2 67.747 1 0-1 0 2-1 1-1

O12_Bi1_O5 165.773 1 0-1 0 1 0 0 0

O12_Bi1_O7 89.133 1 0-1 0 1 0 0 0

O13_Bi1_O1 84.522 1 0 0 0 2-1 1-1

O13_Bi1_O2 159.502 1 0 0 0 2-1 1-1

O13_Bi1_O5 77.232 1 0 0 0 1 0 0 0

O13_Bi1_O7 125.164 1 0 0 0 1 0 0 0

O1_Bi1_O2 82.670 2-1 1-1 2-1 1-1

O1_Bi1_O5 72.147 2-1 1-1 1 0 0 0

O1_Bi1_O7 131.203 2-1 1-1 1 0 0 0

O2_Bi1_O5 113.574 2-1 1-1 1 0 0 0

O2_Bi1_O7 75.106 2-1 1-1 1 0 0 0

O5_Bi1_O7 77.894 1 0 0 0 1 0 0 0

Vector Length Optr Cell Neighbor atom coordinates

Bi2_O31 2.75281 2 0-1-1 0.59583 -0.37786 0.15120

Bi2_O33 2.59549 2 0 0-1 0.62143 0.22372 0.09811

Bi2_O1 2.14867 2 0 0-1 0.88500 -0.19000 0.22100

Bi2_O2 2.36463 2 0 1-1 0.82700 0.26800 0.21800

Bi2_O5 2.34106 1 1-1 0 1.02300 -0.27200 0.13700

Bi2_O7 2.34444 1 1 0 0 1.04700 0.23300 0.14200

Angle Degrees atom 1 loc atom 3 loc

O31_Bi2_O33 92.061 2 0-1-1 2 0 0-1

O31_Bi2_O1 77.500 2 0-1-1 2 0 0-1

O31_Bi2_O2 125.283 2 0-1-1 2 0 1-1

O31_Bi2_O5 83.668 2 0-1-1 1 1-1 0

O31_Bi2_O7 158.616 2 0-1-1 1 1 0 0

O33_Bi2_O1 157.676 2 0 0-1 2 0 0-1

O33_Bi2_O2 97.419 2 0 0-1 2 0 1-1

O33_Bi2_O5 122.600 2 0 0-1 1 1-1 0

O33_Bi2_O7 87.985 2 0 0-1 1 1 0 0

O1_Bi2_O2 73.763 2 0 0-1 2 0 1-1

O1_Bi2_O5 76.324 2 0 0-1 1 1-1 0

O1_Bi2_O7 108.928 2 0 0-1 1 1 0 0

O2_Bi2_O5 130.956 2 0 1-1 1 1-1 0

O2_Bi2_O7 75.816 2 0 1-1 1 1 0 0

O5_Bi2_O7 78.359 1 1-1 0 1 1 0 0

Vector Length Optr Cell Neighbor atom coordinates

Bi3_O41 2.70158 1 0 0 0 0.32443 0.26055 0.88836

Bi3_O42 2.44916 1 0-1 0 0.37136 -0.26361 0.89470

Bi3_O3 2.51645 2 0 0 0 0.84400 -0.27600 0.87600

Bi3_O4 2.18089 2 0 0 0 0.67600 -0.21700 0.95700

Bi3_O6 2.43690 2 0 1 0 0.87000 0.23500 0.88400

Bi3_O8 2.66941 2 0 1 0 0.66000 0.29600 0.96800

Angle Degrees atom 1 loc atom 3 loc

O41_Bi3_O42 73.504 1 0 0 0 1 0-1 0

O41_Bi3_O3 158.410 1 0 0 0 2 0 0 0

O41_Bi3_O4 122.201 1 0 0 0 2 0 0 0

O41_Bi3_O6 110.583 1 0 0 0 2 0 1 0

O41_Bi3_O8 77.182 1 0 0 0 2 0 1 0

O42_Bi3_O3 97.393 1 0-1 0 2 0 0 0

O42_Bi3_O4 76.460 1 0-1 0 2 0 0 0

O42_Bi3_O6 167.553 1 0-1 0 2 0 1 0

O42_Bi3_O8 119.173 1 0-1 0 2 0 1 0

O3_Bi3_O4 72.589 2 0 0 0 2 0 0 0

O3_Bi3_O6 74.562 2 0 0 0 2 0 1 0

O3_Bi3_O8 123.721 2 0 0 0 2 0 1 0

O4_Bi3_O6 109.266 2 0 0 0 2 0 1 0

O4_Bi3_O8 76.238 2 0 0 0 2 0 1 0

O6_Bi3_O8 73.241 2 0 1 0 2 0 1 0

Vector Length Optr Cell Neighbor atom coordinates

Bi4_O22 2.65493 2 0 0 0 0.56031 0.08617 0.45598

Bi4_O23 2.66896 2 0 1 0 0.64523 0.68078 0.50419

Bi4_O3 2.41972 1 0 0 0 0.34400 0.27600 0.37600

Bi4_O4 2.38474 1 0 0 0 0.17600 0.21700 0.45700

Bi4_O6 2.44297 1 0 0 0 0.37000 0.76500 0.38400

Bi4_O8 2.36626 1 0 0 0 0.16000 0.70400 0.46800

Angle Degrees atom 1 loc atom 3 loc

O22_Bi4_O23 90.655 2 0 0 0 2 0 1 0

O22_Bi4_O3 71.606 2 0 0 0 1 0 0 0

O22_Bi4_O4 74.752 2 0 0 0 1 0 0 0

O22_Bi4_O6 132.740 2 0 0 0 1 0 0 0

O22_Bi4_O8 144.497 2 0 0 0 1 0 0 0

O23_Bi4_O3 145.367 2 0 1 0 1 0 0 0

O23_Bi4_O4 133.770 2 0 1 0 1 0 0 0

O23_Bi4_O6 102.275 2 0 1 0 1 0 0 0

O23_Bi4_O8 98.441 2 0 1 0 1 0 0 0

O3_Bi4_O4 71.104 1 0 0 0 1 0 0 0

O3_Bi4_O6 72.433 1 0 0 0 1 0 0 0

O3_Bi4_O8 113.379 1 0 0 0 1 0 0 0

O4_Bi4_O6 120.000 1 0 0 0 1 0 0 0

O4_Bi4_O8 74.257 1 0 0 0 1 0 0 0

O6_Bi4_O8 78.756 1 0 0 0 1 0 0 0

Vector Length Optr Cell Neighbor atom coordinates

Pb1_O14 2.75193 1 0-1 0 0.52053 0.02655 0.28042

Pb1_O22 2.41454 2 0 0 0 0.56031 0.08617 0.45598

Pb1_O41 2.48742 2 0 0-1 0.82443 -0.26055 0.38836

Pb1_O42 2.62000 2 0 1-1 0.87136 0.26361 0.39470

Pb1_O44 2.91067 2 0 1-1 0.64235 0.44869 0.32483

Pb1_O3 2.38680 1 0 0 0 0.34400 0.27600 0.37600

Pb1_O6 2.30250 1 0-1 0 0.37000 -0.23500 0.38400

Angle Degrees atom 1 loc atom 3 loc

O14_Pb1_O22 161.957 1 0-1 0 2 0 0 0

O14_Pb1_O41 104.005 1 0-1 0 2 0 0-1

O14_Pb1_O42 108.264 1 0-1 0 2 0 1-1

O14_Pb1_O44 61.730 1 0-1 0 2 0 1-1

O14_Pb1_O3 85.644 1 0-1 0 1 0 0 0

O14_Pb1_O6 91.835 1 0-1 0 1 0-1 0

O22_Pb1_O41 93.399 2 0 0 0 2 0 0-1

O22_Pb1_O42 80.737 2 0 0 0 2 0 1-1

O22_Pb1_O44 112.991 2 0 0 0 2 0 1-1

O22_Pb1_O3 76.567 2 0 0 0 1 0 0 0

O22_Pb1_O6 82.105 2 0 0 0 1 0-1 0

O41_Pb1_O42 74.368 2 0 0-1 2 0 1-1

O41_Pb1_O44 121.303 2 0 0-1 2 0 1-1

O41_Pb1_O3 168.657 2 0 0-1 1 0 0 0

O41_Pb1_O6 93.988 2 0 0-1 1 0-1 0

O42_Pb1_O44 60.769 2 0 1-1 2 0 1-1

O42_Pb1_O3 108.615 2 0 1-1 1 0 0 0

O42_Pb1_O6 158.568 2 0 1-1 1 0-1 0

O44_Pb1_O3 68.388 2 0 1-1 1 0 0 0

O44_Pb1_O6 138.991 2 0 1-1 1 0-1 0

O3_Pb1_O6 79.558 1 0 0 0 1 0-1 0

Vector Length Optr Cell Neighbor atom coordinates

Pb2_O12 2.87099 2 0 2 0 0.66801 0.85762 0.76421

Pb2_O43 2.32652 1 0 0 0 0.50226 0.49261 0.82161

Pb2_O44 2.64321 1 1 0 0 1.14235 0.55131 0.82483

Pb2_O3 2.15235 2 0 1 0 0.84400 0.72400 0.87600

Pb2_O6 2.38621 2 0 1 0 0.87000 0.23500 0.88400

Angle Degrees atom 1 loc atom 3 loc

O12_Pb2_O43 70.941 2 0 2 0 1 0 0 0

O12_Pb2_O44 103.470 2 0 2 0 1 1 0 0

O12_Pb2_O3 87.624 2 0 2 0 2 0 1 0

O12_Pb2_O6 162.370 2 0 2 0 2 0 1 0

O43_Pb2_O44 169.389 1 0 0 0 1 1 0 0

O43_Pb2_O3 93.581 1 0 0 0 2 0 1 0

O43_Pb2_O6 99.047 1 0 0 0 2 0 1 0

O44_Pb2_O3 76.957 1 1 0 0 2 0 1 0

O44_Pb2_O6 83.899 1 1 0 0 2 0 1 0

O3_Pb2_O6 78.364 2 0 1 0 2 0 1 0

Vector Length Optr Cell Neighbor atom coordinates

Pb3_O12 2.45692 1 1-1 0 1.16801 0.14238 0.26421

Pb3_O14 2.68322 1 0-1 0 0.52053 0.02655 0.28042

Pb3_O1 2.16343 2 0 0-1 0.88500 -0.19000 0.22100

Pb3_O2 2.18686 2 0 1-1 0.82700 0.26800 0.21800

Angle Degrees atom 1 loc atom 3 loc

O12_Pb3_O14 166.007 1 1-1 0 1 0-1 0

O12_Pb3_O1 84.609 1 1-1 0 2 0 0-1

O12_Pb3_O2 78.902 1 1-1 0 2 0 1-1

O14_Pb3_O1 96.692 1 0-1 0 2 0 0-1

O14_Pb3_O2 87.775 1 0-1 0 2 0 1-1

O1_Pb3_O2 77.204 2 0 0-1 2 0 1-1

Vector Length Optr Cell Neighbor atom coordinates

Pb4_O11 2.36871 2-1 2 0 -0.09455 0.74138 0.69935

Pb4_O13 2.86654 2-1 1 0 -0.18711 0.20055 0.71142

Pb4_O31 2.34310 1 0 1 0 0.09583 0.37786 0.65120

Pb4_O44 2.79804 1 0 0 0 0.14235 0.55131 0.82483

Pb4_O1 2.68951 1 0 0 0 0.38500 0.19000 0.72100

Pb4_O2 2.24572 1 0 0 0 0.32700 0.73200 0.71800

Angle Degrees atom 1 loc atom 3 loc

O11_Pb4_O13 76.518 2-1 2 0 2-1 1 0

O11_Pb4_O31 78.784 2-1 2 0 1 0 1 0

O11_Pb4_O44 105.114 2-1 2 0 1 0 0 0

O11_Pb4_O1 152.491 2-1 2 0 1 0 0 0

O11_Pb4_O2 89.869 2-1 2 0 1 0 0 0

O13_Pb4_O31 71.676 2-1 1 0 1 0 1 0

O13_Pb4_O44 105.365 2-1 1 0 1 0 0 0

O13_Pb4_O1 104.897 2-1 1 0 1 0 0 0

O13_Pb4_O2 159.633 2-1 1 0 1 0 0 0

O31_Pb4_O44 174.612 1 0 1 0 1 0 0 0

O31_Pb4_O1 75.811 1 0 1 0 1 0 0 0

O31_Pb4_O2 91.045 1 0 1 0 1 0 0 0

O44_Pb4_O1 100.975 1 0 0 0 1 0 0 0

O44_Pb4_O2 92.669 1 0 0 0 1 0 0 0

O1_Pb4_O2 80.274 1 0 0 0 1 0 0 0

Vector Length Optr Cell Neighbor atom coordinates

Pb5_O24 2.27565 2-1 0 0 -0.10816 0.03279 0.50145

Pb5_O33 2.68353 1 0 0 0 0.12143 -0.22372 0.59811

Pb5_O34 2.47204 1 0 1 0 0.08951 0.34749 0.55468

Pb5_O4 2.24292 1 0 0 0 0.17600 0.21700 0.45700

Pb5_O8 2.22376 1 0-1 0 0.16000 -0.29600 0.46800

Angle Degrees atom 1 loc atom 3 loc

O24_Pb5_O33 90.779 2-1 0 0 1 0 0 0

O24_Pb5_O34 71.693 2-1 0 0 1 0 1 0

O24_Pb5_O4 77.888 2-1 0 0 1 0 0 0

O24_Pb5_O8 84.915 2-1 0 0 1 0-1 0

O33_Pb5_O34 87.585 1 0 0 0 1 0 1 0

O33_Pb5_O4 165.836 1 0 0 0 1 0 0 0

O33_Pb5_O8 102.586 1 0 0 0 1 0-1 0

O34_Pb5_O4 80.844 1 0 1 0 1 0 0 0

O34_Pb5_O8 154.703 1 0 1 0 1 0-1 0

O4_Pb5_O8 85.034 1 0 0 0 1 0-1 0

Vector Length Optr Cell Neighbor atom coordinates

Pb6_O21 2.55205 1 1 1 0 1.10038 0.91111 0.05270

Pb6_O23 2.65848 1 1 0 0 1.14523 0.31922 0.00419

Pb6_O32 2.35562 2 1 0-1 1.30572 0.46337 0.09636

Pb6_O5 2.18018 1 1 0 0 1.02300 0.72800 0.13700

Pb6_O7 2.51933 1 1 0 0 1.04700 0.23300 0.14200

Angle Degrees atom 1 loc atom 3 loc

O21_Pb6_O23 92.398 1 1 1 0 1 1 0 0

O21_Pb6_O32 83.365 1 1 1 0 2 1 0-1

O21_Pb6_O5 71.465 1 1 1 0 1 1 0 0

O21_Pb6_O7 140.466 1 1 1 0 1 1 0 0

O23_Pb6_O32 72.893 1 1 0 0 2 1 0-1

O23_Pb6_O5 151.982 1 1 0 0 1 1 0 0

O23_Pb6_O7 107.035 1 1 0 0 1 1 0 0

O32_Pb6_O5 82.375 2 1 0-1 1 1 0 0

O32_Pb6_O7 70.636 2 1 0-1 1 1 0 0

O5_Pb6_O7 75.881 1 1 0 0 1 1 0 0

Vector Length Optr Cell Neighbor atom coordinates

Pb7_O23 2.73175 2 0 1 0 0.64523 0.68078 0.50419

Pb7_O24 2.66161 2 0 0 0 0.89184 0.03279 0.50145

Pb7_O34 2.66780 1 1 1 0 1.08951 0.34749 0.55468

Pb7_O42 2.58372 2 0 1-1 0.87136 0.26361 0.39470

Pb7_O4 2.47161 1 1 0 0 1.17600 0.21700 0.45700

Pb7_O8 2.29455 1 1 0 0 1.16000 0.70400 0.46800

Angle Degrees atom 1 loc atom 3 loc

O23_Pb7_O24 103.726 2 0 1 0 2 0 0 0

O23_Pb7_O34 99.429 2 0 1 0 1 1 1 0

O23_Pb7_O42 114.347 2 0 1 0 2 0 1-1

O23_Pb7_O4 169.920 2 0 1 0 1 1 0 0

O23_Pb7_O8 112.626 2 0 1 0 1 1 0 0

O24_Pb7_O34 63.007 2 0 0 0 1 1 1 0

O24_Pb7_O42 80.144 2 0 0 0 2 0 1-1

O24_Pb7_O4 67.071 2 0 0 0 1 1 0 0

O24_Pb7_O8 134.578 2 0 0 0 1 1 0 0

O34_Pb7_O42 135.034 1 1 1 0 2 0 1-1

O34_Pb7_O4 73.031 1 1 1 0 1 1 0 0

O34_Pb7_O8 84.432 1 1 1 0 1 1 0 0

O42_Pb7_O4 69.222 2 0 1-1 1 1 0 0

O42_Pb7_O8 107.094 2 0 1-1 1 1 0 0

O4_Pb7_O8 73.878 1 1 0 0 1 1 0 0

Vector Length Optr Cell Neighbor atom coordinates

Pb8_O11 2.82099 1 0-1 0 0.40545 0.25862 0.19935

Pb8_O13 2.62210 1 0-1 0 0.31289 -0.20055 0.21142

Pb8_O21 2.46779 1 0 0 0 0.10038 -0.08889 0.05270

Pb8_O5 2.35165 1 0-1 0 0.02300 -0.27200 0.13700

Pb8_O7 2.29512 1 0 0 0 0.04700 0.23300 0.14200

Angle Degrees atom 1 loc atom 3 loc

O11_Pb8_O13 61.933 1 0-1 0 1 0-1 0

O11_Pb8_O21 152.141 1 0-1 0 1 0 0 0

O11_Pb8_O5 123.578 1 0-1 0 1 0-1 0

O11_Pb8_O7 74.549 1 0-1 0 1 0 0 0

O13_Pb8_O21 142.895 1 0-1 0 1 0 0 0

O13_Pb8_O5 74.668 1 0-1 0 1 0-1 0

O13_Pb8_O7 99.317 1 0-1 0 1 0 0 0

O21_Pb8_O5 70.411 1 0 0 0 1 0-1 0

O21_Pb8_O7 86.218 1 0 0 0 1 0 0 0

O5_Pb8_O7 79.129 1 0-1 0 1 0 0 0

Vector Length Optr Cell Neighbor atom coordinates

V1_O11 1.72242 1 0 0 0 0.40545 1.25862 0.19935

V1_O12 1.71847 1 0 0 0 0.16801 1.14238 0.26421

V1_O13 1.71275 1 0 0 0 0.31289 0.79945 0.21142

V1_O14 1.72379 1 0 0 0 0.52053 1.02655 0.28042

Angle Degrees atom 1 loc atom 3 loc

O11_V1_O12 109.496 1 0 0 0 1 0 0 0

O11_V1_O13 109.531 1 0 0 0 1 0 0 0

O11_V1_O14 109.016 1 0 0 0 1 0 0 0

O12_V1_O13 109.799 1 0 0 0 1 0 0 0

O12_V1_O14 109.466 1 0 0 0 1 0 0 0

O13_V1_O14 109.515 1 0 0 0 1 0 0 0

Vector Length Optr Cell Neighbor atom coordinates

V2_O21 1.71747 1 0 0 0 0.10038 -0.08889 0.05270

V2_O22 1.71356 1 0 0 0 0.06031 -0.08617 -0.04402

V2_O23 1.72252 1 0 0 0 0.14523 0.31922 0.00419

V2_O24 1.72343 1 0 0 0 0.39184 -0.03279 0.00145

Angle Degrees atom 1 loc atom 3 loc

O21_V2_O22 109.750 1 0 0 0 1 0 0 0

O21_V2_O23 109.287 1 0 0 0 1 0 0 0

O21_V2_O24 109.477 1 0 0 0 1 0 0 0

O22_V2_O23 109.470 1 0 0 0 1 0 0 0

O22_V2_O24 109.665 1 0 0 0 1 0 0 0

O23_V2_O24 109.177 1 0 0 0 1 0 0 0

Vector Length Optr Cell Neighbor atom coordinates

V3_O31 1.72355 1 0 0 0 0.09583 -0.62214 0.65120

V3_O32 1.71885 1 0 0 0 -0.19428 -0.46337 0.59636

V3_O33 1.71792 1 0 0 0 0.12143 -0.22372 0.59811

V3_O34 1.71972 1 0 0 0 0.08951 -0.65251 0.55468

Angle Degrees atom 1 loc atom 3 loc

O31_V3_O32 109.359 1 0 0 0 1 0 0 0

O31_V3_O33 109.404 1 0 0 0 1 0 0 0

O31_V3_O34 109.322 1 0 0 0 1 0 0 0

O32_V3_O33 109.623 1 0 0 0 1 0 0 0

O32_V3_O34 109.538 1 0 0 0 1 0 0 0

O33_V3_O34 109.580 1 0 0 0 1 0 0 0

Vector Length Optr Cell Neighbor atom coordinates

V4_O41 1.72006 1 0 0 0 0.32443 0.26055 0.88836

V4_O42 1.72232 1 0 0 0 0.37136 0.73639 0.89470

V4_O43 1.71910 1 0 0 0 0.50226 0.49261 0.82161

V4_O44 1.71846 1 0 0 0 0.14235 0.55131 0.82483

Angle Degrees atom 1 loc atom 3 loc

O41_V4_O42 109.359 1 0 0 0 1 0 0 0

O41_V4_O43 109.515 1 0 0 0 1 0 0 0

O41_V4_O44 109.541 1 0 0 0 1 0 0 0

O42_V4_O43 109.397 1 0 0 0 1 0 0 0

O42_V4_O44 109.428 1 0 0 0 1 0 0 0

O43_V4_O44 109.587 1 0 0 0 1 0 0 0
